# Supplementary material for: Myrtus communis Essential Oil; Anti-Parasitic Effects and Induction of the Innate Immune System in Mice with Toxoplasma gondii Infection
Source: PubMed Central journal article supplement (PMC7915315; doi:10.3390/molecules26040819), 2021-02-04
Supplement: molecules-26-00819-s001.pdf [file molecules-26-00819-s001.pdf]

**Table S1.** Essential oil composition of *M. communis* identified by GC/MS

| No. | Compound                   | Percentage   |
|-----|----------------------------|--------------|
| 1.  | $\alpha$ -Thujene          | 0.88         |
| 2.  | Camphene                   | 0.58         |
| 3.  | $\delta$ -3-Carene         | 0.73         |
| 4.  | $\alpha$ -Pinene           | 24.7         |
| 5.  | $\beta$ -Pinene            | 1.28         |
| 6.  | $\beta$ -Myrcene           | 0.61         |
| 7.  | $\alpha$ -Terpinene        | 0.23         |
| 8.  | 1,8- Cineole               | 19.6         |
| 9.  | Methyl eugenol             | 1.3          |
| 10. | Linalool                   | 12.6         |
| 11. | $\alpha$ -Terpinyl acetate | 3.8          |
| 12. | Myrtenyl acetate           | 8.3          |
| 13. | $\alpha$ -Phellandrene     | 0.1          |
| 14. | $\beta$ -Ocimene           | 0.11         |
| 15. | 2,6-Octadien               | 0.41         |
| 16. | $\alpha$ -Phellandrene     | 0.1          |
| 17. | $\gamma$ -Terpinene        | 0.5          |
| 18. | $\alpha$ -Terpinolene      | 0.51         |
| 19. | 4-Terpineol                | 0.6          |
| 20. | $\alpha$ -Terpineol        | 6.1          |
| 21. | Linalyl Acetate            | 5.9          |
| 22. | Caryophyllene oxide        | 1.4          |
| 23. | $\alpha$ -Humulene         | 1.2          |
| 24. | Neryl acetate              | 0.14         |
| 25. | trans-Caryophyllene        | 1.33         |
|     | <b>Total</b>               | <b>93.01</b> |
